# Supplementary material
Source: PubMed Central journal article supplement (PMC3754677)
Supplement: JCM.00729-13_zjm999092733so1.pdf [file JCM.00729-13_zjm999092733so1.pdf]

**Supplementary Table 1. Predominant organisms by HOMIM.**

| <b>Taxon(a) targeted by HOMIM probe</b>                                                                                                                          | <b>Avg. HOMIM score</b> | <b>Prevalence</b> |
|------------------------------------------------------------------------------------------------------------------------------------------------------------------|-------------------------|-------------------|
| <i>Streptococcus</i> genus HOT-All probe-Q65                                                                                                                     | 4.4 ± 0.7               | 100%              |
| <i>Streptococcus anginosus-S. intermedius</i> HOT-543-644 probe-Q62                                                                                              | 4.1 ± 0.7               | 100%              |
| <i>Veillonella atypica</i> HOT-524 probe-W88                                                                                                                     | 4.1 ± 1.2               | 100%              |
| <i>Streptococcus oralis</i> HOT-707 probe-F46                                                                                                                    | 3.9 ± 0.9               | 100%              |
| <i>Streptococcus salivarius-S. sanguinis-S. vestibularis-S. spp.</i> HOT-021-064-071-755-758 probe Q59                                                           | 3.6 ± 1.4               | 100%              |
| <i>Haemophilus parainfluenzae</i> HOT-718 probe-W79                                                                                                              | 3.6 ± 1.0               | 100%              |
| <i>Fusobacterium</i> Cluster HOT-200-201-202-203-205-370-420-689-698 probe-AE01                                                                                  | 3.5 ± 1.3               | 100%              |
| <i>Campylobacter gracilis</i> HOT-623 probe-X34                                                                                                                  | 3.5 ± 0.8               | 100%              |
| <i>Veillonella dispar</i> HOT-160 probe-AD63                                                                                                                     | 3.5 ± 1.1               | 100%              |
| <i>Gemella haemolysans</i> HOT-626 probe-K63                                                                                                                     | 3.2 ± 1.0               | 100%              |
| <i>Leptotrichiaceae-Leptotrichia-Sneathia</i> Cluster HOT-210-212-213-214-215-217-218-219-220-221-222-223-224-225-392-462-463-498-563-837-844-847-879 probe-AA45 | 3.0 ± 1.0               | 100%              |
| <i>Streptococcus anginosus-S. gordonii</i> HOT-543-622 probe-F49                                                                                                 | 2.8 ± 1.3               | 100%              |
| <i>Streptococcus constellatus-S. intermedius</i> HOT-576-644 probe-AB77                                                                                          | 3.6 ± 1.1               | 98%               |
| <i>Streptococcus constellatus-S. intermedius</i> HOT-576-644 probe-F48                                                                                           | 3.6 ± 1.2               | 98%               |
| <i>Gemella morbillorum</i> HOT-046 probe-K64                                                                                                                     | 3.5 ± 0.9               | 98%               |
| <i>Campylobacter concisus-C. rectus</i> HOT-575-748 probe-T86                                                                                                    | 3.3 ± 1.3               | 98%               |
| <i>Capnocytophaga granulosa-C. sp.</i> HOT-325-326 probe-AA89                                                                                                    | 3.8 ± 1.1               | 97%               |
| <i>Campylobacter gracilis</i> HOT-623 probe-Q04                                                                                                                  | 3.4 ± 1.4               | 97%               |
| <i>Veillonella dispar-V.parvula</i> HOT-160-161 probe-AC37                                                                                                       | 2.9 ± 1.4               | 97%               |
| <i>Campylobacter concisus-C. rectus</i> HOT-575-748 probe-T86                                                                                                    | 2.5 ± 1.5               | 95%               |
| <i>Streptococcus cristatus</i> HOT-578 probe-AA47                                                                                                                | 2.2 ± 1.2               | 95%               |
| <i>Streptococcus anginosus-S. intermedius</i> HOT-543-644 probe-AB82                                                                                             | 2.7 ± 1.1               | 93%               |
| <i>Granulicatella elegans</i> HOT-596 probe-AB29                                                                                                                 | 2.4 ± 1.5               | 93%               |
| <i>Streptococcus sanguinis-S. sp</i> HOT-058-758 probe-AB78                                                                                                      | 2.7 ± 1.0               | 90%               |
| <i>Streptococcus mitis</i> bv 2 HOT-398 probe-Q64                                                                                                                | 2.1 ± 1.2               | 90%               |
| <i>Streptococcus sanguinis-S. sp</i> HOT-058-758 probe-AB75                                                                                                      | 2.7 ± 1.4               | 86%               |
| <i>Campylobacter showae</i> HOT-763 probe-X35                                                                                                                    | 2.2 ± 1.5               | 83%               |
| <i>Parvimonas micra</i> HOT-111 probe-L97                                                                                                                        | 2.1 ± 1.5               | 83%               |
| <i>Dialister invisus</i> HOT-118 probe-P73                                                                                                                       | 2.0 ± 0.9               | 79%               |
| <i>Eubacterium yurii-Peptostreptococcaceae [XI][G-7] sp.</i> HOT-106-377 probe-W84                                                                               | 2.0 ± 1.2               | 76%               |
