# Supplementary material
Source: PubMed Central journal article supplement (PMC3754677)
Supplement: JCM.00729-13_zjm999092733so2.pdf [file JCM.00729-13_zjm999092733so2.pdf]

**Supplementary Table 2. Bacterial species that increased in numbers and prevalence comparing healthy subjects to those with LAP.**

| <b>Taxon(a) targeted by HOMIM probe</b>                                                                                                                   | <b>Average<br/>HOMIM<br/>Score<br/>health</b> | <b>Average<br/>HOMIM<br/>score<br/>LAP</b> | <b>Average<br/>HOMIM<br/>score<br/>change</b> | <b>Prevalence<br/>health</b> | <b>Prevalence<br/>LAP</b> | <b>Prevalence<br/>change</b> |
|-----------------------------------------------------------------------------------------------------------------------------------------------------------|-----------------------------------------------|--------------------------------------------|-----------------------------------------------|------------------------------|---------------------------|------------------------------|
| <i>Actinomyces massiliensis</i> -A.sp. HOT-177-852 probe-X45                                                                                              | 1.0 ± 0.5                                     | 0.2 ± 0.4                                  | -0.813                                        | 88%                          | 20%                       | -67%                         |
| <i>Granulicatella elegans</i> HOT-596 probe-AB28                                                                                                          | 1.1 ± 1.0                                     | 0.0 ± 0.0                                  | -1.138                                        | 66%                          | 0%                        | -66%                         |
| <i>Megasphaera</i> sp. HOT-123 probe-AD11                                                                                                                 | 1.0 ± 0.6                                     | 0.2 ± 0.4                                  | -0.853                                        | 83%                          | 18%                       | -65%                         |
| <i>Granulicatella elegans</i> HOT-596 probe-AB29                                                                                                          | 2.4 ± 1.1                                     | 0.4 ± 0.7                                  | -2.045                                        | 93%                          | 30%                       | -64%                         |
| <i>Rothia dentocariosa</i> -R. <i>mucilaginoso</i> HOT-587-681 probe-E52                                                                                  | 0.9 ± 0.8                                     | 0.1 ± 0.3                                  | -0.806                                        | 66%                          | 9%                        | -56%                         |
| <i>Actinomyces</i> Cluster I: HOT-170-171-176-178-179-180-617-618-645-671-688-701-708-849-850-852-877 probe-AB35                                          | 0.9 ± 0.7                                     | 0.2 ± 0.4                                  | -0.720                                        | 71%                          | 16%                       | -55%                         |
| <i>Prevotella</i> Cluster II: <i>P. denticola</i> - <i>P. fusca</i> - <i>P. multiformis</i> - <i>P. scopos</i> HOT-291-685-782-885 probe-X13              | 0.9 ± 0.8                                     | 0.1 ± 0.3                                  | -0.766                                        | 64%                          | 11%                       | -52%                         |
| <i>Capnocytophaga sputigena</i> HOT-775 probe-AC15                                                                                                        | 1.8 ± 1.4                                     | 0.4 ± 0.7                                  | -1.424                                        | 78%                          | 27%                       | -50%                         |
| <i>Streptococcus australis</i> - <i>S. oligofermentans</i> - <i>S. sp.</i> HOT-065-073-886 probe-AB83                                                     | 0.5 ± 0.5                                     | 0.5 ± 0.9                                  | -1.190                                        | 74%                          | 30%                       | -45%                         |
| <i>Streptococcus sanguinis</i> - <i>S. sp.</i> HOT-058-758 probe-AB78                                                                                     | 0.9 ± 0.5                                     | 1.2 ± 1.7                                  | -1.451                                        | 86%                          | 43%                       | -43%                         |
| <i>Haemophilus</i> sp. HOT-035 probe-P07                                                                                                                  | 1.7 ± 1.2                                     | 0.5 ± 0.7                                  | -1.414                                        | 79%                          | 36%                       | -43%                         |
| <i>Streptococcus sanguinis</i> - <i>S. sp.</i> HOT-058-758 probe-AB75                                                                                     | 2.7 ± 1.5                                     | 1.3 ± 1.7                                  | -1.400                                        | 90%                          | 48%                       | -42%                         |
| <i>Gemella morbillorum</i> HOT-046 probe-K64                                                                                                              | 1.4 ± 0.9                                     | 0.6 ± 0.8                                  | -0.726                                        | 83%                          | 41%                       | -42%                         |
| <i>Capnocytophaga sputigena</i> HOT-775 probe-W40                                                                                                         | 0.8 ± 1.0                                     | 0.1 ± 0.3                                  | -0.777                                        | 48%                          | 7%                        | -41%                         |
| <i>Prevotella loescheii</i> - <i>P. sp.</i> HOT-472-658 probe-Y64                                                                                         | 1.3 ± 1.0                                     | 0.4 ± 0.7                                  | -0.879                                        | 72%                          | 32%                       | -41%                         |
| <i>Actinomyces gerencseriae</i> HOT-618 probe-E46                                                                                                         | 1.6 ± 1.1                                     | 0.7 ± 0.9                                  | 0.893                                         | 76%                          | 39%                       | -37%                         |
| <i>Prevotella loescheii</i> - <i>P. spp.</i> HOT-317-472-658 probe-Y65                                                                                    | 1.0 ± 0.9                                     | 0.3 ± 0.5                                  | -0.710                                        | 60%                          | 25%                       | -35%                         |
| <i>Prevotella</i> Cluster IV: HOT-288-311-313-314-396-443-469-556-572-583-600-643-658-693-714-782-885 probe AA44                                          | 1.1 ± 1.0                                     | 0.3 ± 0.6                                  | -0.751                                        | 57%                          | 25%                       | -32%                         |
| <i>Kingella oralis</i> HOT-706 probe-AA77                                                                                                                 | 1.6 ± 1.2                                     | 0.7 ± 0.9                                  | -0.922                                        | 74%                          | 43%                       | -31%                         |
| <i>Streptococcus</i> sp. HOT-067 probe-E34                                                                                                                | 1.3 ± 1.4                                     | 0.3 ± 0.6                                  | -0.940                                        | 53%                          | 25%                       | -28%                         |
| <i>Streptococcus mitis</i> bv 2 HOT-398 probe-Q64                                                                                                         | 2.1 ± 1.2                                     | 1.0 ± 1.1                                  | -1.098                                        | 90%                          | 61%                       | -28%                         |
| <i>Gemella haemolysans</i> HOT-626 probe-K63                                                                                                              | 3.2 ± 1.2                                     | 1.5 ± 1.3                                  | -1.719                                        | 100%                         | 73%                       | -27%                         |
| <i>Veillonella dispar</i> - <i>V. parvula</i> HOT-160-161 probe-AC37                                                                                      | 2.9 ± 1.3                                     | 1.7 ± 1.3                                  | -1.272                                        | 97%                          | 70%                       | -26%                         |
| <i>Streptococcus parasanguinis</i> I- <i>S. parasanguinis</i> II- <i>S. spp.</i> HOT-055-057-411-721 probe-AB05                                           | 1.7 ± 1.0                                     | 0.9 ± 0.9                                  | -0.741                                        | 90%                          | 64%                       | -26%                         |
| <i>Kingella oralis</i> HOT-706 probe-O86                                                                                                                  | 1.9 ± 1.2                                     | 1.0 ± 1.0                                  | -0.926                                        | 84%                          | 59%                       | -25%                         |
| <i>Prevotella nigrescens</i> HOT-693 probe-W40                                                                                                            | 1.6 ± 1.5                                     | 0.6 ± 0.8                                  | -0.961                                        | 66%                          | 41%                       | -25%                         |
| <i>Veillonella parvula</i> HOT-161 probe-M04                                                                                                              | 2.0 ± 0.9                                     | 1.3 ± 1.0                                  | -0.710                                        | 91%                          | 68%                       | -23%                         |
| <i>Veillonella atypica</i> HOT-524 probe-W88                                                                                                              | 1.2 ± 1.4                                     | 2.7 ± 1.5                                  | -1.393                                        | 100%                         | 77%                       | -23%                         |
| <i>Veillonella dispar</i> HOT-160 probe-AD63                                                                                                              | 3.5 ± 1.0                                     | 2.5 ± 1.7                                  | -1.011                                        | 100%                         | 77%                       | -23%                         |
| Leptotrichiaceae-Leptotrichia-Sneathia Cluster HOT-210-212-213-214-215-217-218-219-220-221-222-223-224-225-392-462-463-498-563-837-844-847-879 probe-AA45 | 3.0 ± 0.9                                     | 1.7 ± 1.1                                  | -1.358                                        | 100%                         | 80%                       | -20%                         |
