# Supplementary material
Source: PubMed Central journal article supplement (PMC3754677)
Supplement: JCM.00729-13_zjm999092733so3.pdf [file JCM.00729-13_zjm999092733so3.pdf]

**Supplementary Table 3. Bacterial species that increase in numbers and prevalence comparing those with LAP to healthy subjects.**

| <b>Taxon(a) targeted by HOMIM probe</b>                                                                | <b>Average HOMIM score health</b> | <b>Average HOMIM score LAP</b> | <b>Average HOMIM score change</b> | <b>Prevalence health</b> | <b>Prevalence LAP</b> | <b>Prevalence change</b> |
|--------------------------------------------------------------------------------------------------------|-----------------------------------|--------------------------------|-----------------------------------|--------------------------|-----------------------|--------------------------|
| <i>Aggregatibacter actinomycetemcomitans</i> HOT-531 probe-P02                                         | 0.2 ± 0.8                         | 1.2 ± 1.1                      | 0.958                             | 9%                       | 64%                   | 55%                      |
| <i>Aggregatibacter actinomycetemcomitans</i> HOT-531 probe-AA84                                        | 0.1 ± 0.5                         | 0.9 ± 0.9                      | 0.743                             | 5%                       | 57%                   | 52%                      |
| <i>Filifactor alocis</i> HOT-539 probe AB95                                                            | 0.7 ± 1.4                         | 2.5 ± 2.0                      | 1.89                              | 22%                      | 68%                   | 46%                      |
| <i>Peptostreptococcaceae [XIII][G-1] sp.</i> HOT-113 probe-P72                                         | 0.2 ± 0.7                         | 1.7 ± 1.9                      | 1.452                             | 9%                       | 50%                   | 41%                      |
| <i>Filifactor alocis</i> HOT-539 probe AB94                                                            | 0.4 ± 1.0                         | 1.6 ± 1.7                      | 1.177                             | 16%                      | 57%                   | 41%                      |
| <i>Filifactor alocis</i> HOT-539 probe-AA69                                                            | 0.6 ± 1.2                         | 2.3 ± 1.8                      | 1.635                             | 28%                      | 68%                   | 41%                      |
| <i>Lachnospiraceae [G-5] sp.</i> HOT-080 probe-AA65                                                    | 0.1 ± 0.7                         | 0.9 ± 1.1                      | 0.743                             | 5%                       | 45%                   | 40%                      |
| <i>Treponema socranskii</i> HOT-769 probe-AC38                                                         | 0.4 ± 0.7                         | 1.1 ± 0.9                      | 0.712                             | 26%                      | 66%                   | 40%                      |
| <i>Tannerella forsythia</i> HOT-613 probe-X56                                                          | 0.5 ± 1.0                         | 1.1 ± 1.1                      | 0.534                             | 29%                      | 59%                   | 30%                      |
| <i>Porphyromonas gingivalis</i> HOT-619 probe-AA93                                                     | 0.5 ± 0.7                         | 0.5 ± 0.8                      | 0.362                             | 7%                       | 32%                   | 25%                      |
| <i>Parvimonas micra</i> HOT-111 probe-V05                                                              | 1.6 ± 1.6                         | 2.7 ± 1.6                      | 1.021                             | 60%                      | 84%                   | 24%                      |
| <i>Treponema</i> Cluster: <i>Treponema</i> spp. HOT-250-251-252-253-254-256-508-517 probe-AC44         | 0.0 ± 0.3                         | 0.4 ± 0.8                      | 0.397                             | 2%                       | 25%                   | 23%                      |
| <i>Peptostreptococcaceae [XIII][G-1] sp.</i> HOT-113 probe-AD07                                        | 0.0 ± 0.1                         | 0.3 ± 0.6                      | 0.324                             | 2%                       | 25%                   | 23%                      |
| <i>Eubacterium [XI][G-6] nodatum</i> HOT-694 probe-Y46                                                 | 0.1 ± 0.3                         | 0.4 ± 0.8                      | 0.346                             | 7%                       | 27%                   | 20%                      |
| <i>Selenomonas sputigena-S. sp.</i> HOT-143-151 probe-AB04                                             | 0.4 ± 0.9                         | 0.8 ± 1.0                      | 0.255                             | 26%                      | 45%                   | 20%                      |
| <i>Porphyromonas gingivalis</i> HOT-619 probe-X21                                                      | 0.1 ± 0.6                         | 1.0 ± 0.9                      | 0.495                             | 40%                      | 59%                   | 19%                      |
| <i>Treponema</i> Cluster: <i>Treponema</i> spp. HOT-250-251-252-253-254-255-256-508-517-518 probe-AC43 | 0.1 ± 0.3                         | 0.3 ± 0.5                      | 0.198                             | 3%                       | 23%                   | 19%                      |
| <i>Prevotella intermedia</i> HOT-643 probe-AB92                                                        | 0.2 ± 0.5                         | 0.4 ± 0.7                      | 0.254                             | 10%                      | 30%                   | 19%                      |
| <i>Eubacterium [XI][G-1] infirmum</i> HOT-105 probe-Y45                                                | 0.5 ± 1.0                         | 0.9 ± 1.2                      | 0.346                             | 24%                      | 43%                   | 19%                      |
| <i>Treponema</i> genus HOT-All probe-AA63                                                              | 0.7 ± 0.8                         | 1.3 ± 1.1                      | 0.600                             | 50%                      | 68%                   | 18%                      |
| <i>Eubacterium [XI][G-3] brachy</i> HOT-557 probe-O47                                                  | 0.7 ± 0.9                         | 0.9 ± 0.9                      | 0.277                             | 41%                      | 59%                   | 18%                      |
| <i>Desulfobulbus</i> sp. HOT-041 probe-K70                                                             | 0.1 ± 0.3                         | 0.5 ± 1.0                      | 0.431                             | 5%                       | 23%                   | 18%                      |
| <i>Dialister pneumosintes</i> HOT-736 probe-X78                                                        | 0.6 ± 1.2                         | 1.0 ± 1.3                      | 0.351                             | 26%                      | 43%                   | 17%                      |
| <i>Veillonellaceae [G-1] sp.</i> HOT-155 probe-AB59                                                    | 0.4 ± 0.7                         | 0.6 ± 0.8                      | 0.223                             | 29%                      | 45%                   | 16%                      |
| <i>Peptostreptococcaceae [XI][G-4] spp.</i> HOT-103-369 probe-AB49                                     | 0.1 ± 0.5                         | 0.3 ± 0.7                      | 0.215                             | 5%                       | 20%                   | 15%                      |
| <i>Treponema</i> Cluster HOT-257-262-264-265-541 probe-AC41                                            | 0.2 ± 0.5                         | 0.4 ± 0.7                      | 0.237                             | 14%                      | 27%                   | 13%                      |
| <i>Selenomonas</i> spp. HOT-138-146-892 probe-Q52                                                      | 0.8 ± 1.0                         | 1.0 ± 1.0                      | 0.195                             | 47%                      | 59%                   | 13%                      |
| <i>Anaeroglobus geminatus</i> HOT-121 probe-AA56                                                       | 0.1 ± 0.3                         | 0.4 ± 0.8                      | 0.271                             | 14%                      | 25%                   | 11%                      |
| <i>Dialister invisus</i> HOT-118 probe-AA94                                                            | 1.0 ± 1.0                         | 1.4 ± 1.2                      | 0.404                             | 55%                      | 66%                   | 11%                      |
| <i>Eubacterium yurii</i> - <i>Peptostreptococcaceae [XI][G-7] sp.</i> HOT-106-377 probe-W84            | 2.0 ± 1.5                         | 2.5 ± 1.5                      | 0.443                             | 76%                      | 86%                   | 11%                      |
